# Supplementary material for: Direct assessment of ionic liquid fragility from transport property variation at moderate temperatures
Source: Royal Society of Chemistry journal article supplement (doi:10.1039/d6ra03960j), 2026-05-20
Supplement: d6ra03960j1.pdf [file d6ra03960j1.pdf]

**Supplementary Information**

**Direct assessment of ionic liquid fragility from transport property variation at moderate temperatures**

Adhip Rahman<sup>a</sup>, Shayanta Chowdhury<sup>b§</sup>, and Md. Abu Bin Hasan Susan<sup>b\*</sup>

<sup>a</sup>*Biochemistry and Microbiology Department, North South University, Dhaka – 1229, Bangladesh*

<sup>b</sup>*Department of Chemistry, University of Dhaka, Dhaka – 1000, Bangladesh*

\*Email correspondence: [susan@du.ac.bd](mailto:susan@du.ac.bd)

§*Current Address: Dept. of Chemistry and Biochemistry, University of Notre Dame, IN 46556, USA.*

## S.1. Experimental Details

### Chemicals

The five aprotic ILs used for viscosity measurement (see Table S.2 below) were obtained from Sigma-Aldrich, and were used as received (water content < 100 ppm).

### Viscosity measurement

Dynamic viscosities of the samples were obtained by using an Anton Paar Lovis 2000 ME rolling-ball viscometer (precision level,  $\pm 0.001$  mPa s) within a temperature range of 293-343 K (precision level,  $\pm 0.01$  K) at 5 K intervals.

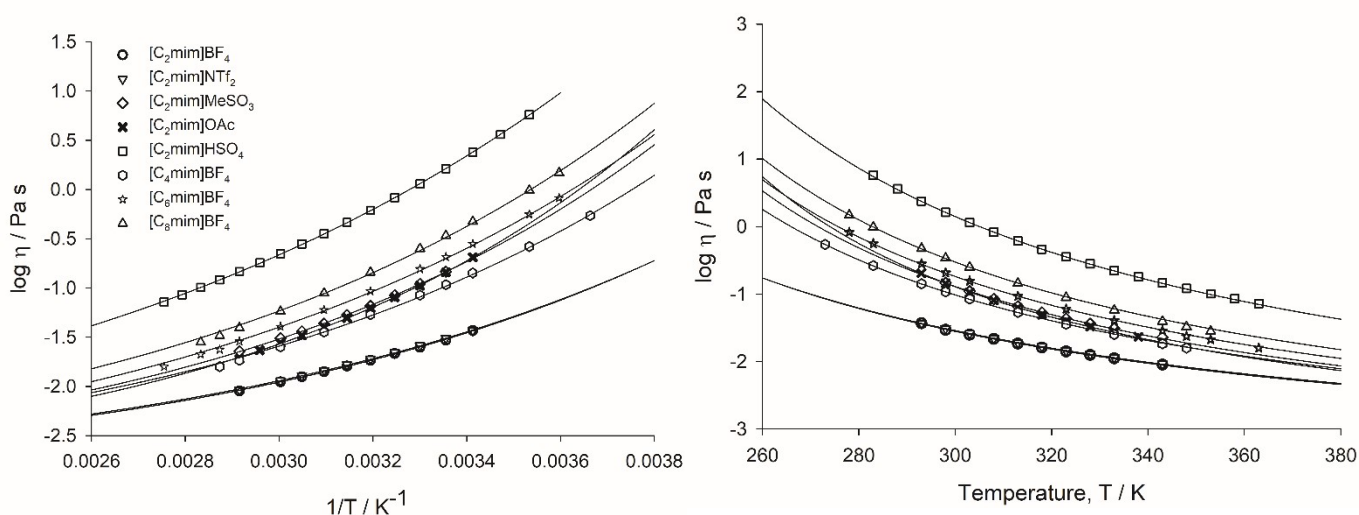

**Figure S.1.** Dynamic viscosity values on increasing temperature for a representative series of ILs and fits (solid lines) to - (left) modified MYEGA, and (right) modified VFT equations. Data for  $[\text{C}_2\text{mim}]\text{BF}_4$ ,  $[\text{C}_2\text{mim}]\text{NTf}_2$ ,  $[\text{C}_2\text{mim}]\text{OAc}$ , and  $[\text{C}_2\text{mim}]\text{MeSO}_3$  are given in Table S.4, data for the rest of the ILs were taken from the references listed in Table S.2 (see below).

**Table S.1.** Chemical structures of the cations and anions of the ILs surveyed in this work.

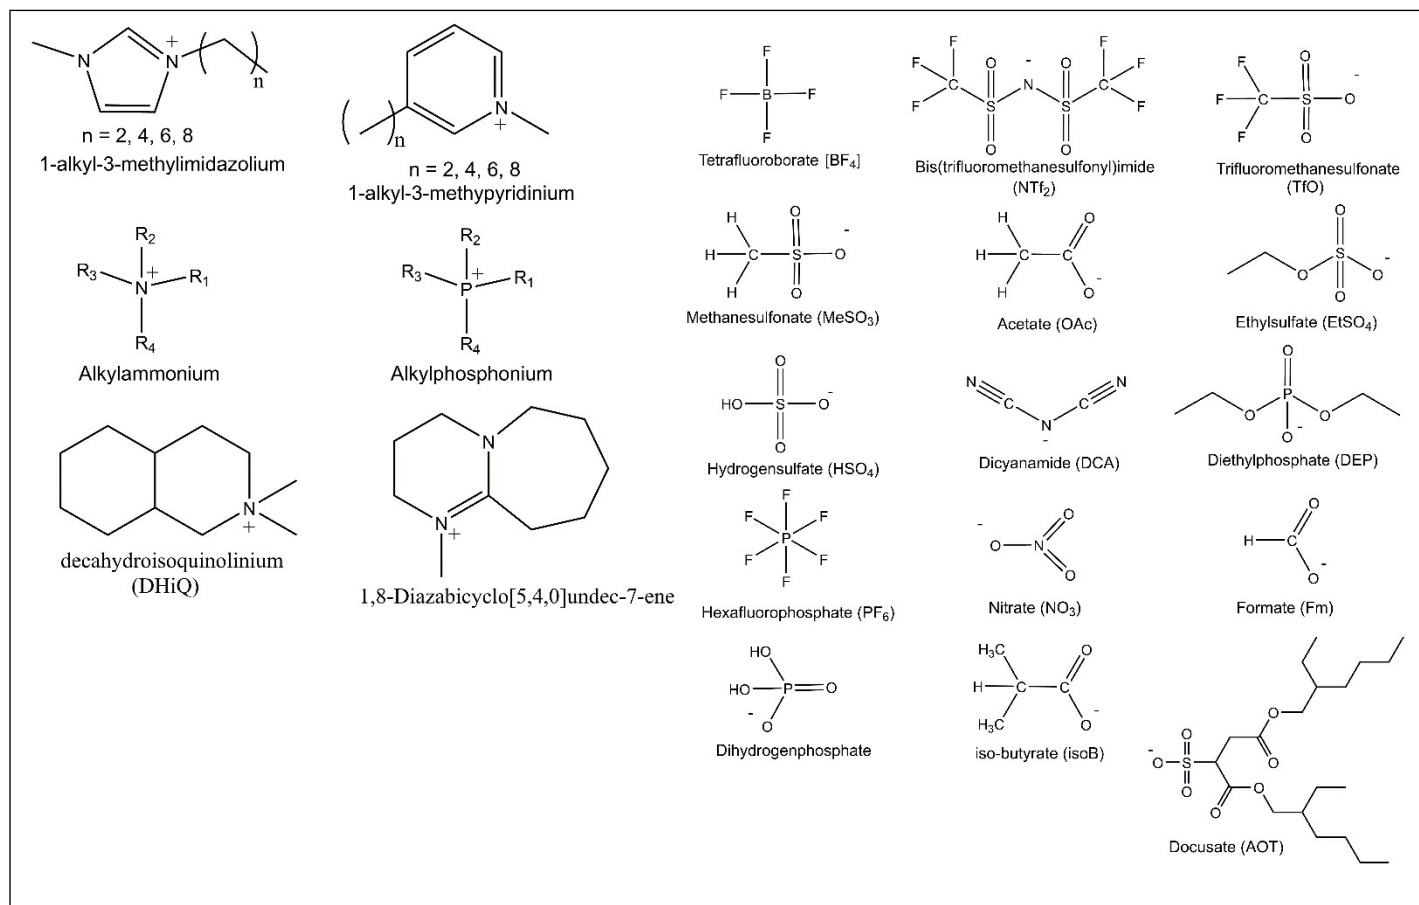

**Table S.2.** List of ILs surveyed in this work, references from which  $T_g$ s, and viscosity data were taken; the full reference list can be found in the references section of the SI (see below).

| ILs                                                                                                      | Refs. for $T_g$ s | Refs. for viscosity data |
|----------------------------------------------------------------------------------------------------------|-------------------|--------------------------|
| 1-ethyl-3-methylimidazolium tetrafluoroborate, [C <sub>2</sub> mim]BF <sub>4</sub>                       | [1]               | this work                |
| 1-ethyl-3-methylimidazolium bis(trifluoromethanesulfonyl)imide, [C <sub>2</sub> mim]NTf <sub>2</sub>     | [2], [3], [4]     | this work, [2], [25]     |
| 1-ethyl-3-methylimidazolium trifluoromethanesulfonate, [C <sub>2</sub> mim]TfO                           | [5]               | this work                |
| 1-ethyl-3-methylimidazolium acetate, [C <sub>2</sub> mim]OAc                                             | [6], [7], [8]     | this work                |
| 1-ethyl-3-methylimidazolium methanesulfonate, [C <sub>2</sub> mim]MeSO <sub>3</sub>                      | [9], [16]         | this work                |
| 1-ethyl-3-methylimidazolium ethylsulfate, [C <sub>2</sub> mim]EtSO <sub>4</sub>                          | [9], [10]         | [11]                     |
| 1-ethyl-3-methylimidazolium dicyanamide, [C <sub>2</sub> mim]DCA                                         | [12]              | [13]                     |
| 1-ethyl-3-methylimidazolium hydrogensulfate, [C <sub>2</sub> mim]HSO <sub>4</sub>                        | [14]              | [15]                     |
| 1-ethyl-3-methylimidazolium diethylphosphate, [C <sub>2</sub> mim]DEP                                    | [16], [17]        | [18]                     |
| 1-butyl-3-methylimidazolium tetrafluoroborate, [C <sub>4</sub> mim]BF <sub>4</sub>                       | [19], [20]        | [21]                     |
| 1-hexyl-3-methylimidazolium tetrafluoroborate, [C <sub>6</sub> mim]BF <sub>4</sub>                       | [22], [25]        | [23]                     |
| 1-octyl-3-methylimidazolium tetrafluoroborate, [C <sub>8</sub> mim]BF <sub>4</sub>                       | [22], [25]        | [24]                     |
| 1-butyl-3-methylimidazolium bis(trifluoromethanesulfonyl)imide [C <sub>4</sub> mim]NTf <sub>2</sub>      | [2]               | [2]                      |
| 1-hexyl-3-methylimidazolium bis(trifluoromethanesulfonyl)imide [C <sub>6</sub> mim]NTf <sub>2</sub>      | [2]               | [2]                      |
| 1-octyl-3-methylimidazolium bis(trifluoromethanesulfonyl)imide [C <sub>8</sub> mim]NTf <sub>2</sub>      | [2], [25]         | [2]                      |
| 1-butyl-3-methylimidazolium hexafluorophosphate, [C <sub>4</sub> mim]PF <sub>6</sub>                     | [26]              | [27]                     |
| 1-octyl-3-methylimidazolium phosphate, [C <sub>8</sub> mim]PF <sub>6</sub>                               | [24]              | [28]                     |
| 1-butyl-3-methylimidazolium tetrachloroferrate, [C <sub>4</sub> mim]FeCl <sub>4</sub>                    | [29]              | [29]                     |
| 1-butyl-3-methylpyridinium tetrafluoroborate, [C <sub>4</sub> mPy]BF <sub>4</sub>                        | [25]              | [25]                     |
| 1-butyl-3-methylpyridinium bis(trifluoromethanesulfonyl)imide, [C <sub>4</sub> mPy]NTf <sub>2</sub>      | [25]              | [25]                     |
| 1-hexyl-3-methylpyridinium bis(trifluoromethanesulfonyl)imide [C <sub>6</sub> mPy]NTf <sub>2</sub>       | [25]              | [25]                     |
| 1-octyl-3-methylpyridinium bis(trifluoromethanesulfonyl)imide, [C <sub>8</sub> mPy]NTf <sub>2</sub>      | [25]              | [25]                     |
| 1-ethyl-3-methylpyridinium ethylsulfate, [C <sub>2</sub> mPy]EtSO <sub>4</sub>                           | [25]              | [25]                     |
| 1-ethylnicotinium ethylsulfate, [Et <sub>2</sub> Nic]EtSO <sub>4</sub>                                   | [25]              | [25]                     |
| 1-butyl-3-methylimidazolium docusate, [C <sub>4</sub> mim]AOT                                            | [30]              | [31]                     |
| Tetrabutylammonium docusate, [N <sub>444,4</sub> ]AOT                                                    | [25]              | [25]                     |
| Heptyltrimethylphosphonium docusate, [P <sub>444,7</sub> ]AOT                                            | [32]              | [32]                     |
| Butyltrimethylammonium bis(trifluoromethanesulfonyl)imide, [N <sub>411,1</sub> ]NTf <sub>2</sub>         | [33]              | [34]                     |
| Tributylmethylammonium bis(trifluoromethanesulfonyl)imide, [N <sub>444,1</sub> ]NTf <sub>2</sub>         | [35]              | [34]                     |
| Trihexyltetradecylphosphonium bis(trifluoromethanesulfonyl)imide, [P <sub>666,14</sub> ]NTf <sub>2</sub> | [36]              | [37]                     |
| Triethylammonium methanesulfonate, [N <sub>222,0</sub> ]MeSO <sub>3</sub>                                | [38]              | [38]                     |
| Trimethylammonium dihydrogenphosphate, [N <sub>111,0</sub> ]H <sub>2</sub> PO <sub>4</sub>               | [38]              | [38]                     |
| Ethylammonium hydrogensulfate, [N <sub>200,0</sub> ]HSO <sub>4</sub>                                     | [38]              | [38]                     |
| Butylammonium hydrogensulfate, [N <sub>400,0</sub> ]HSO <sub>4</sub>                                     | [38]              | [38]                     |
| Ethylammonium nitrate, [N <sub>200,0</sub> ]NO <sub>3</sub>                                              | [38]              | [38]                     |
| Decahydroisoquinolinium bis(trifluoromethanesulfonyl)imide, [DHiQ]NTf <sub>2</sub>                       | [39]              | [39]                     |
| Decahydroisoquinolinium isobutyrate, [DHiQ]isoB                                                          | [39]              | [39]                     |
| Decahydroisoquinolinium formate, [DHiQ]Fm                                                                | [39]              | [39]                     |
| Decahydroisoquinolinium hydrogensulfate, [DHiQ]HSO <sub>4</sub>                                          | [39]              | [39]                     |
| Decahydroisoquinolinium methanesulfonate, [DHiQ]MeSO <sub>3</sub>                                        | [39]              | [39]                     |
| 1,8-diazabicyclo-[5,4,0]-undec-7-ene trifluoromethanesulfonate,                                          | [40]              | [40]                     |

|                                                                               |      |      |
|-------------------------------------------------------------------------------|------|------|
| [DBU]TfO                                                                      |      |      |
| 1,8-diazabicyclo-[5,4,0]-undec-7-ene acetate, [DBU]OAc                        | [40] | [40] |
| 1,8-diazabicyclo-[5,4,0]-undec-7-ene methanesulfonate, [DBU]MeSO <sub>3</sub> | [40] | [40] |
| 1-methylpyridinium hydrogensulfate, [C <sub>1</sub> Py]HSO <sub>4</sub>       | [41] | [41] |
| 1-methylpyrrolidinium hydrogensulfate, [C <sub>1</sub> Py]HSO <sub>4</sub>    | [41] | [41] |
| 1-methylimidazolium hydrogensulfate, [C <sub>0</sub> mim]HSO <sub>4</sub>     | [41] | [41] |
| 1-butyl-3-methylimidazolium chloride, [C <sub>4</sub> mim]Cl                  | [42] | [43] |
| 1-octyl-3-methylimidazolium chloride, [C <sub>8</sub> mim]Cl                  | [44] | [45] |

**Table S.3.** Modified MYEGA- and modified VFT-fitted mean  $T_g$ s and dynamic fragilities ( $m$ ) (experimental  $T_g$ s listed for comparison purposes, see Table S.2 for their sources)

| ILs                                      | Experimental $T_g$ / K | MYEGA-Fitted $T_g$ and $m$ at $\eta_0 = 10^{-2.9 \pm 0.3}$ Pa s | MYEGA-fitted $T_g$ and $m$ at $\eta_0 = 10^{-2.7 \pm 0.2}$ Pa s | VFT-fitted $T_g$ and $m$ at $\eta_0 = 10^{-3.9 \pm 0.3}$ Pa s |
|------------------------------------------|------------------------|-----------------------------------------------------------------|-----------------------------------------------------------------|---------------------------------------------------------------|
| [C <sub>2</sub> mim]BF <sub>4</sub>      | 178                    | 173±13, 82±13                                                   | 184±10, 95±12                                                   | 164±16, 113±32                                                |
| [C <sub>2</sub> mim]NTf <sub>2</sub>     | 170, 181, 186          | 172±11, 81±12                                                   | 183±10, 93±12                                                   | 165±14, 117±40                                                |
| [C <sub>2</sub> mim]TfO                  | 180                    | 171±10, 77±10                                                   | 180±8, 87±10                                                    | 164±13, 108±25                                                |
| [C <sub>2</sub> mim]OAc                  | 193, 196, 207          | 197±7, 85±8                                                     | 203±6, 93±8                                                     | 207±8, 158±26                                                 |
| [C <sub>2</sub> mim]MeSO <sub>3</sub>    | 211                    | 191±7, 79±8                                                     | 198±6, 87±8                                                     | 198±8, 137±27                                                 |
| [C <sub>2</sub> mim]EtSO <sub>4</sub>    | 189, 192               | 182±7, 77±11                                                    | 188±5, 83±7                                                     | 177±8, 98±17                                                  |
| [C <sub>2</sub> mim]DCA                  | 177                    | 172±15, 90±17                                                   | 184±12, 107±17                                                  | 155±15, 120±34                                                |
| [C <sub>2</sub> mim]HSO <sub>4</sub>     | 199                    | 193±4, 63±4                                                     | 197±3, 66±4                                                     | 201±5, 95±11                                                  |
| [C <sub>2</sub> mim]DEP                  | 204, 207               | 200±5, 77±7                                                     | 204±4, 83±6                                                     | 209±7, 133±20                                                 |
| [C <sub>4</sub> mim]BF <sub>4</sub>      | 187                    | 185±7, 77±9                                                     | 189±6, 83±8                                                     | 185±8, 108±20                                                 |
| [C <sub>6</sub> mim]BF <sub>4</sub>      | 188, 194               | 189±7, 75±8                                                     | 192±4, 79±5                                                     | 190±7, 104±18                                                 |
| [C <sub>8</sub> mim]BF <sub>4</sub>      | 190, 192               | 190±5, 72±6                                                     | 195±4, 77±5                                                     | 199±5, 119±16                                                 |
| [C <sub>4</sub> mim]NTf <sub>2</sub>     | 186                    | 182±12, 83±15                                                   | 190±9, 92±10                                                    | 171±12, 103±26                                                |
| [C <sub>6</sub> mim]NTf <sub>2</sub>     | 192                    | 185±8, 82±11                                                    | 184±5, 91±9                                                     | 190±10, 139±29                                                |
| [C <sub>8</sub> mim]NTf <sub>2</sub>     | 189, 193               | 187±8, 80±10                                                    | 192±6, 86±8                                                     | 192±9, 135±26                                                 |
| [C <sub>4</sub> mim]PF <sub>6</sub>      | 191                    | 184±6, 71±7                                                     | 193±3, 78±3                                                     | 191±5, 101±15                                                 |
| [C <sub>8</sub> mim]PF <sub>6</sub>      | 194                    | 195±5, 70±7 <sup>a</sup>                                        | 198±3, 74±4                                                     | 199±6, 99±14                                                  |
| [C <sub>4</sub> mim][FeCl <sub>4</sub> ] | 188                    | 175±10, 80±12                                                   | 183±8, 90±12                                                    | 172±13, 119±29                                                |
| [C <sub>4</sub> mPy]BF <sub>4</sub>      | 197                    | 194±5, 80±8                                                     | 199±4, 87±6                                                     | 198±5, 119±17                                                 |
| [C <sub>4</sub> mPy]NTf <sub>2</sub>     | 189                    | 181±10, 80±13                                                   | 188±8, 88±8                                                     | 173±11, 101±24                                                |
| [C <sub>6</sub> mPy]NTf <sub>2</sub>     | 191                    | 184±7, 79±9 <sup>a</sup>                                        | 190±5, 87±6                                                     | 180±8, 105±19                                                 |
| [C <sub>8</sub> mPy]NTf <sub>2</sub>     | 193                    | 187±5, 78±9                                                     | 193±5, 86±7                                                     | 193±8, 134±23                                                 |
| [C <sub>2</sub> mPy]EtSO <sub>4</sub>    | 202                    | 214±3, 75±5                                                     | 217±2, 79±4                                                     | 223±4, 118±12                                                 |
| [Et <sub>2</sub> Nic]EtSO <sub>4</sub>   | 211                    | 214±2, 76±5                                                     | 218±1, 82±2                                                     | 223±4, 117±13                                                 |
| [C <sub>4</sub> mim]AOT                  | 209                    | 196±4, 60±4                                                     | 199±4, 62±4                                                     | 197±4, 77±9                                                   |
| [N <sub>444,4</sub> ]AOT                 | 211                    | 208±3, 65±4                                                     | 214±2, 69±3                                                     | 220±4, 94±10                                                  |

|                                                     |          |                          |                          |                           |
|-----------------------------------------------------|----------|--------------------------|--------------------------|---------------------------|
| [P <sub>444,7</sub> ]AOT                            | 197      | 203±3, 67±4              | 205±3, 70±3              | 209±4, 96±10              |
| [N <sub>411,1</sub> ]NTf <sub>2</sub>               | 193, 198 | 188±8, 80±9              | 194±6, 88±8              | 195±8, 139±26             |
| [N <sub>444,1</sub> ]NTf <sub>2</sub>               | 201      | 204±4, 80±7 <sup>a</sup> | 208±3, 85±4              | 210±4, 122±15             |
| [P <sub>666,14</sub> ]NTf <sub>2</sub>              | 195      | 175±5, 63±5 <sup>b</sup> | 180±4, 67±4 <sup>b</sup> | 170±6, 76±11 <sup>b</sup> |
| [N <sub>222,0</sub> ]MeSO <sub>3</sub>              | 176      | 195±9, 85±11             | 203±7, 96±10             | 199±10, 145±32            |
| [N <sub>111,0</sub> ]H <sub>2</sub> PO <sub>4</sub> | 237      | 225±3, 64±3              | 227±2, 67±2              | 236±4, 100±10             |
| [N <sub>200,0</sub> ]HSO <sub>4</sub>               | 177      | 180±6, 62±7              | 186±5, 68±4              | 180±8, 88±15              |
| [N <sub>400,0</sub> ]HSO <sub>4</sub>               | 210      | 207±4, 72±5              | 210±3, 75±4              | 219±5, 121±14             |
| [N <sub>200,0</sub> ]NO <sub>3</sub>                | 182      | 175±12, 81±13            | 184±8, 92±11             | 169±14, 118±30            |
| [DHiQ]NTf <sub>2</sub>                              | 227      | 221±4, 87±8              | 225±3, 94±6              | 227±5, 138±16             |
| [DHiQ]isoB                                          | 226      | 237±3, 102±7             | 240±2, 107±6             | -- <sup>c</sup>           |
| [DHiQ]Fm                                            | 212      | 225±4, 95±7              | 228±2, 101±6             | -- <sup>c</sup>           |
| [DHiQ]HSO <sub>4</sub>                              | 246      | 194±7, 53±5              | 200±5, 57±4              | 195±10, 69±11             |
| [DHiQ]MeSO <sub>3</sub>                             | 228      | 243±3, 96±5              | 246±3, 90±7              | 261±3, 185±20             |
| [C <sub>1</sub> Py]HSO <sub>4</sub>                 | 203      | 197±6, 69±6              | 202±4, 74±5              | 206±6, 112±15             |
| [C <sub>1</sub> Pyr]HSO <sub>4</sub>                | 177      | 172±8, 62±6              | 179±6, 67±6              | 169±11, 83±17             |
| [C <sub>0</sub> mim]HSO <sub>4</sub>                | 200      | 182±7, 64±6              | 187±4, 70±5              | 176±9, 95±16              |
| [DBU]TfO                                            | 211      | 210±7, 80±9              | 216±5, 87±6              | 219±8, 138±23             |
| [DBU]OAc                                            | 229      | 238±4, 102±9             | 242±3, 111±8             | -- <sup>c</sup>           |
| [DBU]MeSO <sub>3</sub>                              | 232      | 239±4, 88±7              | 243±3, 95±6              | 254±5, 88±7               |
| [C <sub>4</sub> mim]Cl <sup>d</sup>                 | 225      | 223±9, 77±9              | 230±6, 85±7              | 230±10, 128±24            |
| [C <sub>8</sub> mim]Cl <sup>d</sup>                 | 227      | 224±2, 73±3              | 230±2, 76±3              | 238±3, 129±12             |

<sup>a</sup>Thermodynamic fragility calculated from DSC data in ref. 35: [C<sub>4</sub>mim]PF<sub>6</sub>: 54±3, [C<sub>6</sub>mPy]NTf<sub>2</sub>: 106±8, [N<sub>444,1</sub>]NTf<sub>2</sub>: 88±9

<sup>b</sup>Limited temperature window and limited viscosity datapoints

<sup>c</sup>VFT fitted dynamic fragility > 200 at  $\eta_\alpha = 10^{-3.6}$  Pa s – hence not included.

**Table S.4.** Experimental data for viscosity against temperature of the ILs carried out for this work (referred to Table S.2 as “this work”)

| Temperature / K | [C <sub>2</sub> mim]BF <sub>4</sub> | [C <sub>2</sub> mim]NTf <sub>2</sub> | [C <sub>2</sub> mim]TfO | [C <sub>2</sub> mim]OAc | [C <sub>2</sub> mim]MeSO <sub>3</sub> |
|-----------------|-------------------------------------|--------------------------------------|-------------------------|-------------------------|---------------------------------------|
| 293.0           | 36.872                              | 39.717                               | 50.110                  | 204.42                  | -                                     |
| 298.0           | 29.502                              | 30.830                               | 40.393                  | 144.31                  | 146.48                                |
| 303.0           | 24.964                              | 25.970                               | 34.536                  | 105.72                  | 109.86                                |
| 308.0           | 21.578                              | 22.150                               | 28.703                  | 80.649                  | 84.293                                |
| 313.0           | 18.434                              | 19.070                               | 25.001                  | 62.495                  | 65.891                                |
| 318.0           | 16.117                              | 16.630                               | 21.501                  | 49.553                  | 53.151                                |
| 323.0           | 14.105                              | 14.570                               | 18.826                  | 40.006                  | 43.419                                |
| 328.0           | 12.532                              | 12.870                               | 16.223                  | 32.967                  | 36.258                                |
| 333.0           | 11.129                              | 11.440                               | 14.594                  | 27.564                  | 30.884                                |
| 343.0           | 8.992                               | 9.218                                | 11.588                  | 19.030                  | 22.801                                |

**Table S.5.** Modified-MYEGA and -VFT fitted parameters<sup>a</sup> for ILs listed in Table S.4

| Temperature / K | [C <sub>2</sub> mim]BF <sub>4</sub> |     | [C <sub>2</sub> mim]NTf <sub>2</sub> |     | [C <sub>2</sub> mim]TfO |     | [C <sub>2</sub> mim]OAc |     | [C <sub>2</sub> mim]MeSO <sub>3</sub> |     |
|-----------------|-------------------------------------|-----|--------------------------------------|-----|-------------------------|-----|-------------------------|-----|---------------------------------------|-----|
|                 | MYEGA                               | VFT | MYEGA                                | VFT | MYEGA                   | VFT | MYEGA                   | VFT | MYEGA                                 | VFT |
| M               | 79                                  | 111 | 79                                   | 109 | 75                      | 103 | 84                      | 153 | 78                                    | 133 |
| T <sub>g</sub>  | 172                                 | 164 | 171                                  | 163 | 170                     | 164 | 197                     | 208 | 191                                   | 198 |

<sup>a</sup>Data reported here correspond to  $\log \eta_a = - 2.9$ , for modified-MYEGA fits and  $\log \eta_a = - 3.9$  for modified-VFT fits.

## Theory of the MYEGA equation

Phenomenological description of the MYEGA equation has been discussed elsewhere<sup>46-48</sup>, briefly this is discussed below. The starting point of deriving the MYEGA equation is the Adam-Gibbs equation<sup>46</sup> –

$$\log \eta = \log \eta_{\alpha} + \frac{B}{TS_c} \dots\dots\dots \text{s.1}$$

This equation relates the viscosity to the configurational entropy  $S_c$ , and B is a constant. In order to incorporate the glass transition temperature ( $T_g$ ) and dynamic fragility (m) into this equation,  $T_g$  is considered to be the temperature where  $\eta = 10^{12}$  Pa s.<sup>49</sup> Meanwhile, m is considered to be the rate at which the  $\eta$  changes with temperature until  $T_g$ , so then the m-fragility can be expressed as –

$$m = \frac{d \log \eta}{d\left(\frac{T_g}{T}\right)} \Bigg|_{T=T_g} \dots\dots\dots \text{s.2}$$

Gupta and Mauro accounted for a topological model to further advance eq. s.1. In it, they interpreted the  $S_c$  based on the approach of Phillips and Thorpe<sup>50</sup> – which suggests that near the  $T_g$ , the glassy dynamics of a material consists of two components – the atomic translational degrees of freedom and the number of interatomic force variables (i.e., covalent bonds and bond angles). Upon decreasing temperature, the glass transition maximizes exactly when these two components become equal of each other. Until then, the  $S_c$  is dominated by the atomic degrees of freedom – which was termed to be a “floppy” mode. At floppy mode, a liquid has  $f > 0$ , where f summarizes the number of floppy modes per atom. Following the energy landscape analysis of Naumis<sup>51</sup> and the topological approach of Gupta et al.<sup>48</sup>,  $S_c$  can be written as follows –

$$S_c = f N k \ln \Omega \dots\dots\dots \text{s.3}$$

Here, N is number of atoms, k is Boltzmann’s constant, and  $\Omega$  is the number of configurations per floppy mode. Mauro et al.<sup>47</sup> accounted for f in that given the atomic network constraints are either intact or broken, f can be written as –

$$f = 3 \exp\left(-\frac{H}{kT}\right) \dots\dots\dots \text{s.4}$$

Where H is an energy barrier between the “on or off” constraints. Putting these values in eq. s.1 gives –

$$\log \eta = \log \eta_{\alpha} + \frac{K}{T} \exp\left(\frac{C}{T}\right) \dots\dots\dots \text{s.5}$$

Where  $K = \frac{B}{3k \ln \Omega}$  considering three translational degrees of freedom per atom, and  $C = \frac{H}{k}$ .

Eq. s.5 is the original form of the MYEGA equation.

Following the approach of Gupta et al.<sup>48</sup>, considering  $\eta = 10^{12}$  Pa s at  $T_g$  and eq. s.2, the dynamic fragility ( $m$ ) can be written<sup>48</sup> in terms of the floppy mode number  $f$  as –

$$m = m_o \left( 1 + \left. \frac{\partial \ln f}{\partial T} \right|_{T=T_g} \right) \dots\dots\dots \text{s.6}$$

Where,  $m_o = \frac{B}{T_g S_c}$  at  $T_g$  for a given material composition. With these expressions of  $m$  and  $\eta$  at  $T_g$ , the eq. s.5 takes the shape of the modified MYEGA equation according to Mauro et al.<sup>47</sup> –

$$\log \eta = \log \eta_{\alpha} + (12 - \log \eta_{\alpha}) \frac{T_g}{T} \exp \left[ \left( \frac{m}{12 - \log \eta_{\alpha}} - 1 \right) \left( \frac{T_g}{T} - 1 \right) \right] \dots\dots\dots \text{s. 7}$$

Similar approach was taken for the modified-VFT equation too, details can be found in Mauro et al.<sup>47</sup>

**Rewriting the MYEGA equation for structural relaxation time**

The modified MYEGA-equation can be written for inverse dc-conductivity as follows –

$$\log \sigma^{-1} = \log \sigma_{\alpha}^{-1} + (13.5 - \log \sigma_{\alpha}^{-1}) \frac{T_g}{T} \exp \left[ \left( \frac{m}{13.5 - \log \sigma_{\alpha}^{-1}} - 1 \right) \left( \frac{T_g}{T} - 1 \right) \right] \dots\dots\dots \text{s.8}$$

Here the work of Sangoro et al.<sup>52</sup> on universal scaling of IL charge transport was based upon to arbitrarily assign the logarithm of dc-resistivity at  $T_g$ ,  $\log \sigma_o^{-1} = 13.5$  cm S<sup>-1</sup>; the logarithm of dc-resistivity at infinite temperature was arbitrarily considered to be  $\log \sigma_{\alpha}^{-1} = 1.8$  cm S<sup>-1</sup>, implying the dc-resistivity at infinitely high temperature be essentially zero ( $\sigma_{\alpha}^{-1} \approx 0.01$ ).

**Standard deviation of fitted- $T_g$ s and m-fragilities**

Each of the IL m-fragilities and  $T_g$ s listed in Table S.3 include respective standard deviation values. They may be seen as crude “standard deviation” thresholds. The following approach was taken (described for MYEGA fits but equally applicable for modified-VFT fits) –

For each of the MYEGA fits, the infinite temperature viscosity,  $\eta_\alpha$ , was taken as  $10^{-2.9 \pm 0.3}$  Pa s in line with the estimation of reference 19 of the main text [*Phys. Rev. B*, 2011, **83**, 212202]. This means that for each of the ILs, the m and  $T_g$  were estimated three times using three different  $\eta_\alpha$  values  $10^{-2.6}$ ,  $10^{-2.9}$ , and  $10^{-3.2}$  Pa s. Each of the MYEGA-fitted m and  $T_g$  values reported in the Table S.3 is an average on these three m and  $T_g$ s. The standard deviation involving the m and  $T_g$ s were then simply calculated using the three m and  $T_g$  values respectively using the following equation –

$$\text{standard deviation} = \sqrt{\frac{\sum_{i=1}^n (x_i - \bar{x})^2}{n-1}} \dots\dots\dots \text{s.9}$$

Due to the sample size being small ( $n = 3$ ), these standard deviation values should be taken as only a qualitative indication of the following two aspects -

- how close the equation can reach in terms of precisely predicting the  $T_g$  and, in turn, assess the m.
- the extent of sensitivity of the fitted m at the change of  $\eta_\alpha$ . Table S.3 would suggest that some IL fragilities and fitted  $T_g$ s are highly sensitive to the change of  $\eta_\alpha$ , when the others are not.

The same approach was followed for the modified-VFT fitted mean m and  $T_g$ s as well as the standard deviations (and for the MYEGA-fits at  $\eta_\alpha = 10^{-2.7 \pm 0.2}$  Pa s too). The Table S.3 also suggests that the standard deviation of m and  $T_g$  mostly favours towards the modified MYEGA-fits. Please note, this approach was not followed for the original VFT-fits (Table 1 of the main text) - see the main text for the related discussions.

## References

1. E. Pamete, B. Gorska, and F. Beguin, *J. Mol. Liq.*, 2020, **298**, 111959.
2. H. Tokuda, K. Hayamizu, K. Ishii, M. A. B. H. Susan, and M. Watanabe, *J. Phys. Chem. B*, 2005, **109**, 6103.
3. C. P. Fredlake, J. M. Crosthwaite, D. G. Hert, S. N. Aki, J. F. Brennecke, *J. Chem. Eng. Data*, 2004, **49**, 954.
4. E. Gomez, N. Calvar, A. Dominguez, and E. A. Macedo, *Ind. Eng. Chem. Res.*, 2013, **52**, 2103.

5. J. E. Bostwick, C. J. Zanelotti, D. Yu, N. F. Pietra, T. A. Williams, L. A. Madsen, and R. H. Colby, *J. Mater. Chem. C*, 2022, **10**, 947.
6. X.-X. Ma, L. Li, J. Wei, W. Duan, W. Guan, and J.-Z. Yang, *J. Chem. Eng. Data*, 2012, **57**, 3171.
7. V. Stejfa, J. Rohlicek, and C. Cervinka, *J. Chem. Thermodyn.*, 2020, **142**, 106020.
8. M. Krolikowska, N. Gos, and M. Skonieczny, *J. Chem. Eng. Data*, 2021, **66**, 3300.
9. V. Stejfa, J. Rohlicek, and C. Cervinka, *J. Chem. Thermodyn.*, 2021, **160**, 106392.
10. N. Shamim, and G. B. McKenna, *J. Phys. Chem. B*, 2010, **114**, 15742.
11. H. Schmidt, M. Stephan, J. Safarov, I. Kul, J. Nocke, I. Abdulagatov, and E. Hassel, *J. Chem. Thermodyn.*, 2012, **47**, 68.
12. K. Bernardino, T. A. Lima, and M. C. C. Ribeiro, *J. Phys. Chem. B*, 2019, **123**, 9418.
13. C. M. S. Neves, K. A. Kurnia, J. A. P. Coutinho, I. M. Marrucho, J. N. C. Lopes, M. G. Freire, and L. P. N. Rebelo, *J. Phys. Chem. B*, 2013, **117**, 10271.
14. L. F. O. Faria, T. A. Lima, F. F. Ferreira, M. and C. C. Ribeiro, *J. Phys. Chem. B*, 2018, **122**, 1972.
15. A. J. L. Costa, J. M. S. S. Esperanca, I. M. Marrucho, and L. P. N. Rebelo, *J. Chem. Eng. Data*, 2011, **56**, 3433.
16. C. M. Tenney, M. Massel, J. M. Mayes, M. Sen, J. F. Brennecke, and E. J. Maginn, *J. Chem. Eng. Data*, 2014, **59**, 391.
17. M. Skonieczny, and M. Krolikowska, *J. Chem. Eng. Data*, 2022, **67**, 869.
18. Y. Hiraga, A. Kato, Y. Sato, and R. L. Smith Jr., *J. Chem. Eng. Data*, 2015, **60**, 876.
19. Y. Yoshimura, H. Kimura, C. Okamoto, T. Miyashita, Y. Imai, and H. Abe, *J. Chem. Thermodyn.*, 2011, **43**, 410.
20. W. Xu, L.-M. Wang, R. A. Nieman, and C. A. Angell, *J. Phys. Chem. B*, 2003, **107**, 11749.
21. K. R. Harris, M. Kanakubo, and L. A. Woolf, *J. Chem. Eng. Data*, 2007, **52**, 2425.
22. J. D. Holbrey, and K. R. Seddon, *J. Chem. Soc. Dalton Trans.*, 1999, 2133.
23. K. R. Harris, and M. Kanakubo, *J. Chem. Eng. Data*, 2021, **66**, 4618.
24. K. R. Harris, M. Kanakubo, and L. A. Woolf, *J. Chem. Eng. Data*, 2006, **51**, 1161.
25. J. M. Crosthwaite, M. J. Muldoon, J. K. Dixon, J. L. Anderson, and J. F. Brennecke, *J. Chem. Thermodyn.*, 2005, **37**, 559.
26. G. J. Kabo, A. V. Blokhin, Y. U. Paulechka, A. G. Kabo, and M. P. Shymanovich, *J. Chem. Eng. Data*, 2004, **49**, 453.
27. K. R. Harris, L. A. Woolf, and M. Kanakubo, *J. Chem. Eng. Data*, 2005, **50**, 1777.
28. J. Safarov, C. Bussemer, A. Aliyev, C. Lafuente, E. Hassel, and I. Abdulagatov, *J. Chem. Thermodyn.*, 2018, **124**, 49.
29. M. M. Cruz, R. P. Borges, M. Godinho, C. S. Marques, E. Langa, A. P. C. Ribeiro, and M. J. V. Lourenco et al., *Fluid Phase Equilib.*, 2013, **350**, 43.
30. H. Li, E. Gorenskaia, R. Morice, J. Wang, G. G. Warr, D. S. Silverter, and R. Atkin, *J. Colloid Interface Sci.*, 2026, **702**, 138968.
31. P. Brown, C. P. Butts, J. Eastoe, D. Fermin, I. Grillo, H.-C. Lee, D. Parker, D. Plana, and R. M. Richardson, *Langmuir*, 2012, **28**, 2502.
32. H. Shirota, X. Liu, Y. Peng, F. Hossain, and R. D. Falcone, *ACS Omega*, 2024, **9**, 38769.
33. J. N. Curry, and S. K. Shaw, *J. Phys. Chem. B*, 2019, **123**, 4757.
34. A. Bhattacharjee, A. Luis, J. H. Santos, J. A. L. da Silva, M. G. Freire, P. J. Carvalho, and J. A. P. Coutinho, *Fluid Ph. Equilib.*, 2014, **381**, 36.
35. Y. Terashima, and T. Hirai, *J. Therm., Anal. Calorim.*, 2022, **147**, 10095.

36. Z. Wojnarowska, S. Cheng, B. Yao, M. S. Kwasny, S. McLaughlin, A. McGrogan, Y. Delavoux, and M. Paluch, *Nat. Commun.*, 2022, **13**, 1342.
37. P. Velho, R. A. Oliveira, and E. A. Macedo, *J. Chem. Eng. Data*, 2025, **70**, 2347.
38. J. -P. Belieres, and C. A. Angell, *J. Phys. Chem. B*, 2007, **111**, 4926.
39. K. Ueno, Z. Zhao, M. Watanabe, and C. Austen Angell, *J. Phys. Chem. B*, 2012, **116**, 63.
40. M. S. Miran, H. Kinoshita, T. Yasuda, M. A. B. H. Susan, and M. Watanabe, *Phys. Chem. Chem. Phys.*, 2012, **14**, 5178.
41. Z. Ullah, M. A. Bustam, Z. Man, N. Muhammad, and A. S. Khan, *RSC Adv.*, 2015, **5**, 71449.
42. O. Yamamuro, Y. Minaminoto, Y. Inamura, S. Hayashi, and H. Hamaguchi, *Chem. Phys. Lett.*, 2006, **423**, 371.
43. S. Fendt, S. Padmanabhan, H. W. Blanch, and J. M. Prausnitz, *J. Chem. Eng. Data*, 2011, **56**, 31.
44. T. Cosby, C. D. Stachurski, R. A. Mantz, P. C. Trulove, and D. P. Durkin, *Phys. Chem. Chem. Phys.*, 2023, **25**, 6342.
45. E. Gomez, B. Gonzalez, A. Dominguez, E. Tojo, and J. Tojo, *J. Chem. Eng. Data*, 2006, **51**, 696.
46. G. Adam, and J. H. Gibbs, *J. Chem. Phys.*, 1965, **43**, 139.
47. J. C. Mauro, Y. Yue, A. J. Ellison, P. K. Gupta, and D. C. Allan, *Proc. Natl. Acad. Sci.*, 2009, **106**, 19780.
48. P. K. Gupta, and J. C. Mauro, *Phys. Rev. B*, 2008, **78**, 062501.
49. Y. Z. Yue, *J. Non-Cryst. Solids*, 2009, **355**, 737.
50. J. C. Phillips, and M. F. Thorpe, *Solid State Commun.*, 1985, **53**, 699.
51. G. G. Naumis, *J. Non-Cryst. Solids*, 2006, **352**, 4865
52. J. R. Sangoro, C. Iacob, A. Serghei, C. Friedrich, and F. Kremer, *Phys. Chem. Chem. Phys.*, 2009, **11**, 913.
